# Supplementary material
Source: PubMed Central journal article supplement (PMC7392118)
Supplement: NIHMS1612163-supplement-1.pdf [file NIHMS1612163-supplement-1.pdf]

Appendix  
Supplemental Materials

Table A1

*Model 1 parameter estimates (coefficients, variances, and covariances)*

| Parameter    | Variable(s)     | Std. Beta | CI (low) | CI (high) | beta   | SE    | z     | p      |
|--------------|-----------------|-----------|----------|-----------|--------|-------|-------|--------|
| Coefficients | SES->Reading    | 0.49      | 0.34     | 0.60      | 17.17  | 2.21  | 7.76  | <0.001 |
|              | SES->Math       | 0.40      | 0.25     | 0.54      | 13.66  | 2.53  | 5.39  | <0.001 |
|              | SES->Verbal     | 0.48      | 0.40     | 0.58      | 1.33   | 0.17  | 7.96  | <0.001 |
|              | SES->EF         | 0.37      | 0.20     | 0.54      | 0.34   | 0.09  | 3.93  | <0.001 |
|              | Verbal->Reading | 0.09      | -0.06    | 0.25      | 1.17   | 0.89  | 1.31  | 0.190  |
|              | EF->Reading     | 0.30      | 0.10     | 0.49      | 11.23  | 4.06  | 2.77  | 0.006  |
|              | Verbal->Math    | -0.09     | -0.29    | 0.08      | -1.12  | 1.15  | -0.97 | 0.331  |
|              | EF->Math        | 0.57      | 0.37     | 0.82      | 21.08  | 5.89  | 3.58  | <0.001 |
| Variances    | Verbal WM       | 0.54      | 0.20     | 0.73      | 0.87   | 0.23  | 3.84  | <0.001 |
|              | Inhibition      | 0.94      | 0.84     | 0.99      | 0.02   | 0.00  | 6.30  | <0.001 |
|              | Spatial WM      | 0.82      | 0.69     | 0.92      | 1.59   | 0.21  | 7.55  | <0.001 |
|              | Planning        | 0.81      | 0.69     | 0.92      | 0.01   | 0.00  | 7.58  | <0.001 |
|              | Reading         | 0.48      | 0.38     | 0.55      | 498.94 | 52.91 | 9.43  | <0.001 |
|              | Math            | 0.43      | 0.26     | 0.55      | 433.35 | 77.40 | 5.60  | <0.001 |
|              | Verbal          | 0.77      | 0.66     | 0.84      | 5.06   | 0.70  | 7.20  | <0.001 |
|              | EF              | 0.86      | 0.70     | 0.96      | 0.65   | 0.19  | 3.33  | <0.001 |
|              | SES             | 1.00      | 1.00     | 1.00      | 0.86   | 0.00  | —     | NA     |
| Covariances  | Math<->Reading  | 0.61      | 0.47     | 0.71      | 283.45 | 58.45 | 4.85  | <0.001 |
|              | Verbal<->EF     | 0.45      | 0.29     | 0.59      | 0.81   | 0.20  | 4.04  | <0.001 |

*Note.* SES = Socioeconomic Status. Verbal = Verbal Fluency. EF = Executive Function. WM = Working Memory. CI (low) and CI (high) represent the lower and upper bounds of the 95% confidence interval for the point estimate, respectively. SE = Standard Error.

Table A2

*Model 2 parameter estimates (coefficients, variances, and covariances)*

| Parameter    | Variable(s)                 | Std. Beta | CI (low) | CI (high) | beta   | SE    | z     | p      |
|--------------|-----------------------------|-----------|----------|-----------|--------|-------|-------|--------|
| Coefficients | SES->Reading                | 0.52      | 0.40     | 0.63      | 18.16  | 2.13  | 8.53  | <0.001 |
|              | SES->Math                   | 0.45      | 0.33     | 0.57      | 15.40  | 2.13  | 7.24  | <0.001 |
|              | SES->Verbal WM              | 0.26      | 0.13     | 0.39      | 0.36   | 0.09  | 3.86  | <0.001 |
|              | SES->Verbal Fluency         | 0.48      | 0.38     | 0.58      | 1.33   | 0.17  | 7.96  | <0.001 |
|              | SES->Inhibition             | 0.19      | 0.08     | 0.31      | 0.03   | 0.01  | 2.95  | 0.003  |
|              | SES->Spatial WM             | 0.06      | -0.07    | 0.19      | 0.09   | 0.10  | 0.87  | 0.386  |
|              | SES->Planning               | 0.19      | 0.05     | 0.33      | 0.02   | 0.01  | 2.69  | 0.007  |
|              | Verbal WM->Reading          | 0.17      | 0.05     | 0.30      | 4.33   | 1.64  | 2.64  | 0.008  |
|              | Verbal Fluency->Reading     | 0.16      | 0.04     | 0.28      | 2.02   | 0.71  | 2.85  | 0.004  |
|              | Inhibition->Reading         | -0.01     | -0.13    | 0.10      | -3.59  | 14.00 | -0.26 | 0.798  |
|              | Spatial WM->Reading         | 0.05      | -0.09    | 0.18      | 1.12   | 1.54  | 0.73  | 0.466  |
|              | Planning->Reading           | 0.03      | -0.09    | 0.15      | 9.32   | 17.00 | 0.55  | 0.583  |
|              | Verbal WM->Math             | 0.24      | 0.12     | 0.37      | 6.02   | 1.63  | 3.69  | <0.001 |
|              | Verbal Fluency->Math        | 0.05      | -0.09    | 0.19      | 0.65   | 0.86  | 0.76  | 0.449  |
|              | Inhibition->Math            | -0.02     | -0.13    | 0.09      | -4.89  | 12.93 | -0.38 | 0.705  |
|              | Spatial WM->Math            | 0.14      | -0.01    | 0.27      | 3.11   | 1.59  | 1.96  | 0.050  |
|              | Planning->Math              | 0.14      | 0.02     | 0.25      | 39.56  | 17.86 | 2.21  | 0.027  |
| Variances    | Reading                     | 0.51      | 0.40     | 0.57      | 529.90 | 46.67 | 11.35 | <0.001 |
|              | Math                        | 0.54      | 0.42     | 0.61      | 545.12 | 48.03 | 11.35 | <0.001 |
|              | Verbal WM                   | 0.93      | 0.85     | 0.98      | 1.51   | 0.16  | 9.26  | <0.001 |
|              | Verbal Fluency              | 0.77      | 0.66     | 0.86      | 5.06   | 0.70  | 7.19  | <0.001 |
|              | Inhibition                  | 0.96      | 0.90     | 0.99      | 0.02   | 0.00  | 6.45  | <0.001 |
|              | Spatial WM                  | 1.00      | 0.96     | 1.00      | 1.95   | 0.19  | 10.21 | <0.001 |
|              | Planning                    | 0.96      | 0.89     | 1.00      | 0.01   | 0.00  | 8.12  | <0.001 |
|              | SES                         | 1.00      | 1.00     | 1.00      | 0.86   | 0.00  | —     | NA     |
| Covariances  | Math<->Reading              | 0.64      | 0.53     | 0.74      | 345.16 | 46.24 | 7.47  | <0.001 |
|              | Verbal Fluency<->Verbal WM  | 0.33      | 0.21     | 0.44      | 0.91   | 0.19  | 4.90  | <0.001 |
|              | Inhibition<->Verbal Fluency | 0.08      | -0.05    | 0.21      | 0.02   | 0.02  | 1.16  | 0.248  |
|              | Spatial WM<->Verbal Fluency | 0.20      | 0.07     | 0.33      | 0.64   | 0.24  | 2.70  | 0.007  |

Table A2 continued

| Parameter | Variable(s)               | Std. Beta | CI (low) | CI (high) | beta | SE   | z    | p      |
|-----------|---------------------------|-----------|----------|-----------|------|------|------|--------|
|           | Planning<->Verbal Fluency | 0.07      | -0.07    | 0.21      | 0.02 | 0.02 | 1.01 | 0.314  |
|           | Inhibition<->Verbal WM    | 0.15      | 0.01     | 0.29      | 0.02 | 0.01 | 2.01 | 0.045  |
|           | Spatial WM<->Verbal WM    | 0.27      | 0.12     | 0.43      | 0.47 | 0.14 | 3.32 | <0.001 |
|           | Planning<->Verbal WM      | 0.23      | 0.07     | 0.40      | 0.03 | 0.01 | 2.52 | 0.012  |
|           | Spatial WM<->Inhibition   | 0.03      | -0.15    | 0.20      | 0.01 | 0.02 | 0.36 | 0.722  |
|           | Planning<->Inhibition     | 0.12      | -0.04    | 0.28      | 0.00 | 0.00 | 1.51 | 0.132  |
|           | Planning<->Spatial WM     | 0.25      | 0.10     | 0.39      | 0.04 | 0.01 | 3.34 | <0.001 |

*Note.* SES = Socioeconomic Status. WM = Working Memory. CI (low) and CI (high) represent the lower and upper bounds of the 95% confidence interval for the point estimate, respectively. SE = Standard Error.

Table A3

*Results of parallel models with single EF mediator*

| EF Mediator | Outcome | EF Ratio | Verbal Fluency Ratio |
|-------------|---------|----------|----------------------|
| Verbal WM   | Reading | 0.08     | 0.12                 |
|             | Math    | 0.14     | 0.06                 |
| Spatial WM  | Reading | 0.01     | 0.16                 |
|             | Math    | 0.02     | 0.11                 |
| Planning    | Reading | 0.02     | 0.17                 |
|             | Math    | 0.07     | 0.14                 |
| Inhibition  | Reading | 0.00     | 0.17                 |
|             | Math    | 0.01     | 0.15                 |
| Full Model  | Reading | 0.08     | 0.12                 |
|             | Math    | 0.16     | 0.04                 |

*Note.* Each model tested mediation of SES associations with reading and math achievement by verbal fluency and a single EF mediator. EF Ratio is the proportion of the total SES-achievement effect mediated by the EF variable. Verbal Fluency Ratio is the proportion of the total SES-achievement effect mediated by the verbal fluency, while controlling for the given EF variable. WM = Working Memory.

Table A4

*Results of models with mediation paths constrained to zero for each EF mediator*

| Constrained Mediator | Chi Sq Diff | p      | Outcome | EF Ratio | Verbal Fluency Ratio |
|----------------------|-------------|--------|---------|----------|----------------------|
| Verbal WM            | 26.53       | <0.001 | Reading | 0.01     | 0.14                 |
|                      |             |        | Math    | 0.04     | 0.10                 |
| Spatial WM           | 6.38        | 0.095  | Reading | 0.07     | 0.12                 |
|                      |             |        | Math    | 0.16     | 0.06                 |
| Planning             | 13.39       | 0.004  | Reading | 0.06     | 0.12                 |
|                      |             |        | Math    | 0.11     | 0.04                 |
| Inhibition           | 6.87        | 0.076  | Reading | 0.07     | 0.12                 |
|                      |             |        | Math    | 0.15     | 0.04                 |
| None (Full Model)    |             |        | Reading | 0.08     | 0.12                 |
|                      |             |        | Math    | 0.16     | 0.04                 |

*Note.* Each model tested mediation of SES associations with reading and math achievement by verbal fluency and a set of EF mediators, while constraining a given mediation path to zero (e.g., when Verbal WM is the Constrained Mediator, paths from SES to Verbal WM and from Verbal WM to Reading to Math are manually set to zero. Chi Sq Diff is the increase in model Chi Square, relative to the full unconstrained model. Significant reduction in model fit is indicated by p values less than 0.05. EF Ratio is the proportion of the total SES-achievement effect mediated by the set of EF variables. Verbal Fluency Ratio is the proportion of the total SES-achievement effect mediated by the verbal fluency. WM = Working Memory.

Table A5

*Results of latent variable models omitting a single EF mediator*

| Omitted Variable  | Outcome | EF Ratio | Verbal Fluency Ratio |
|-------------------|---------|----------|----------------------|
| Verbal WM         | Reading | 0.09     | 0.13                 |
|                   | Math    | 0.25     | 0.03                 |
| Spatial WM        | Reading | 0.20     | 0.07                 |
|                   | Math    | 0.41     | -0.07                |
| Planning          | Reading | 0.17     | 0.05                 |
|                   | Math    | 0.35     | -0.10                |
| Inhibition        | Reading | 0.17     | 0.06                 |
|                   | Math    | 0.37     | -0.09                |
| None (Full Model) | Reading | 0.17     | 0.07                 |
|                   | Math    | 0.37     | -0.08                |

*Note.* Each model variation omitted one of the four indicators from the EF measurement model while estimating all other parameters identically to Model 1. Thus, each model estimated SES->EF->Achievement effects for a slightly different version of EF. EF Ratio is the proportion of the total SES-achievement effect mediated by the latent EF variable for the given set of EF indicators. Verbal Fluency Ratio is the proportion of the total SES-achievement effect mediated by the verbal fluency. WM = Working Memory.
